# Supplementary material
Source: MDPI journal article supplement (https://www.mdpi.com/2076-3387/11/4/154)
Supplement: s1 [file s1]

# Questionnaire (German language)

## Herzlich Willkommen zur Umfrage!

Liebe Teilnehmerin, lieber Teilnehmer,  
Liebe Kolleginnen und Kollegen,

mein Name ist Kirsten Bremer und ich bin seit über 15 Jahren Flugbegleiterin bei Lufthansa. Nebenbei studiere nun Betriebswirtschaftslehre an der IU Internationale Hochschule. Derzeit verfasse ich meine Bachelorarbeit zum Thema „Zukunftskompetenzen von Flugbegleitern - Berufliche Neuorientierung in Zeiten der Pandemie“. Im Rahmen dieser Abschlussarbeit möchte ich herausfinden, wie attraktiv wir Flugbegleiter für den heutigen Jobmarkt sind.

Diese standardisierte Online-Befragung ist an Flugbegleiter jeden Ranges gerichtet. Bitte nehmen Sie daher nur an der Umfrage teil, wenn Sie zum Kabinenpersonal gehören. (Ehemalige Flugbegleiter können leider nicht berücksichtigt werden)

Die Beantwortung der Fragen dauert ca. 10 Minuten. Für den Erfolg der Studie ist eine ehrliche und realistische Beantwortung der Fragen erforderlich. Es geht um Ihre persönliche Einschätzung und Meinung. Sämtliche Daten werden anonym erfasst und Rückschlüsse auf einzelne Teilnehmer sind grundsätzlich ausgeschlossen.

Ich freue mich sehr, wenn Sie diese Umfrage an Kollegen oder befreundetes Kabinenpersonal anderer Airlines weiterleiten.

Bei Fragen oder Anmerkungen können Sie mir gerne eine E-Mail an [kirsten.bremer@iubh-fernstudium.de](mailto:kirsten.bremer@iubh-fernstudium.de) senden.

Schon im Voraus möchte ich mich ganz herzlich für Ihre Unterstützung und Ihre Zeit bedanken.

Liebe Grüße,

Kirsten Bremer

P.S.: Zur Vereinfachung und besseren Lesbarkeit wird bei weiterer Verwendung der männliche Begriff Flugbegleiter verwendet. Diese Bezeichnung gilt jedoch für alle Geschlechter gleichermaßen.

## Datenschutzerklärung

Liebe Teilnehmer,

im Rahmen ihres Studiums an der IU Internationale Hochschule GmbH müssen die Studierenden eine wissenschaftliche Arbeit anfertigen, zu deren Ausarbeitung sie eine Umfrage durchführen sollen.

Der Ihnen vorliegende Fragebogen erhebt neben Ihrem Alter, Geschlecht und Bildungsabschluss Einzelheiten aus Ihrem beruflichen Umfeld sowie Ihre Meinung und Einschätzung zu Kompetenzen, die zukünftig als wichtig erachtet werden.

Ihr Name wird nicht abgefragt und wird nicht auf dem Fragebogen notiert. Die Datenerhebung soll anonym erfolgen. Damit Anonymität gewährleistet ist, machen Sie bitte keinerlei Angaben, die Sie als Person identifizieren können. Geben Sie nur die abgefragten Auskünfte. Nach Ausfüllen des Fragebogens werden die Daten durch Kirsten Bremer anonym ausgewertet, um die Ergebnisse im Rahmen ihrer Bachelorarbeit „Zukunftskompetenzen von Flugbegleitern - Berufliche Neuorientierung in Zeiten der Pandemie“ zu veröffentlichen. Der Originalfragebogen verbleibt bei der Studierenden. Es werden lediglich die Ergebnisse, nicht jedoch die Fragebögen veröffentlicht.

IU Internationale Hochschule GmbH erhält keine personenbezogenen Daten zu Ihrer Person.

Sie stimmen dieser Datenschutzerklärung zu, indem Sie auf „Weiter“ klicken.

## Bei welcher Airline arbeiten Sie?

Bitte wählen Sie Ihren Arbeitgeber.

- |                                 |                                          |                                            |
|---------------------------------|------------------------------------------|--------------------------------------------|
| <input type="radio"/> Lufthansa | <input type="radio"/> Lufthansa Cityline | <input type="radio"/> Austrian Airlines    |
| <input type="radio"/> Condor    | <input type="radio"/> easyJet            | <input type="radio"/> Eurowings            |
| <input type="radio"/> Swiss     | <input type="radio"/> TuiFly             | <input type="radio"/> <input type="text"/> |

## Wie lange arbeiten Sie schon als Flugbegleiter?

- ☐ 0 - 4 Jahre
- ☐ 5 - 10 Jahre
- ☐ 11 - 15 Jahre
- ☐ 16 - 20 Jahre
- ☐ Mehr als 20 Jahre

**Bitte geben Sie Ihren Rang an.**

---

- ☐ Flugbegleiter
- ☐ Purser (Kabinenchef)

**Wie viele Sprachen sprechen Sie neben Deutsch und Englisch, so dass Sie sich gut verständigen können?**

---

Das Sprachniveau sollte mindestens auf B1 Level nach Europäischem Referenzrahmen sein.

*(z.B. Hauptpunkte zu Themen wie Arbeit, Freizeit etc. verstehen; Situationen bewältigen, denen man auf Reisen begegnet; persönliche Interessen, Hoffnungen und Ziele beschreiben)*

- ☐ Ich spreche keine weitere Sprache
- ☐ Ich spreche 1 weitere Sprache
- ☐ Ich spreche 2 weitere Sprachen
- ☐ Ich spreche 3 weitere Sprachen
- ☐ Ich spreche 4 weitere Sprachen
- ☐ Ich spreche mehr als 4 weitere Sprachen

## Welche Kompetenzen sollte ein Flugbegleiter Ihrer Meinung nach haben?

Bitte geben Sie die Wichtigkeit an.

|                                                                                                                                                                                                                                                                                               | unwichtig             | eher unwichtig        | weder unwichtig, noch<br>wichtig | eher wichtig          | wichtig               |
|-----------------------------------------------------------------------------------------------------------------------------------------------------------------------------------------------------------------------------------------------------------------------------------------------|-----------------------|-----------------------|----------------------------------|-----------------------|-----------------------|
| IT- FACHWISSEN, SOFTWAREPROGRAMMIERUNG                                                                                                                                                                                                                                                        | <input type="radio"/> | <input type="radio"/> | <input type="radio"/>            | <input type="radio"/> | <input type="radio"/> |
| DIGITAL LITERACY (Beherrschen von grundlegenden digitalen Skills, z.B. sorgsamer Umgang mit digitalen persönlichen Daten, Nutzen gängiger Software, Interagieren mit künstlicher Intelligenz)                                                                                                 | <input type="radio"/> | <input type="radio"/> | <input type="radio"/>            | <input type="radio"/> | <input type="radio"/> |
| DIGITAL LEARNING (Fähigkeit aus einer Vielzahl digitaler Informationen valides Wissen zu ausgewählten Themengebieten aufzubauen)                                                                                                                                                              | <input type="radio"/> | <input type="radio"/> | <input type="radio"/>            | <input type="radio"/> | <input type="radio"/> |
| DIGITALE INTERAKTION (Bei Interaktion über Online-Kanäle andere verstehen und sich ihnen gegenüber angemessen verhalten („Digitaler Knigge“))                                                                                                                                                 | <input type="radio"/> | <input type="radio"/> | <input type="radio"/>            | <input type="radio"/> | <input type="radio"/> |
| KOLLABORATIONSFÄHIGKEIT (Unabhängig von räumlicher Nähe und über verschiedene Disziplinen und Kulturen hinweg effektiv und effizient zusammenarbeiten, um als Team bessere Resultate als Einzelpersonen zu erzielen)                                                                          | <input type="radio"/> | <input type="radio"/> | <input type="radio"/>            | <input type="radio"/> | <input type="radio"/> |
|                                                                                                                                                                                                                                                                                               | unwichtig             | eher unwichtig        | weder unwichtig, noch<br>wichtig | eher wichtig          | wichtig               |
| TEAMFÄHIGKEIT (Vertrauensvolle Zusammenarbeit in einem Team, in dem jedes Teammitglied seinen Aufgabenbereich hat)                                                                                                                                                                            | <input type="radio"/> | <input type="radio"/> | <input type="radio"/>            | <input type="radio"/> | <input type="radio"/> |
| KOMMUNIKATIONSFÄHIGKEIT (die Fähigkeit zur Übermittlung von Informationen, um sicherzustellen, dass die Bedeutungen unter Berücksichtigung des Publikums und des Mediums wirksam zum Ausdruck gebracht werden. Gleichzeitig gut zuhören und Mimik/Gestik des Gegenübers entschlüsseln können) | <input type="radio"/> | <input type="radio"/> | <input type="radio"/>            | <input type="radio"/> | <input type="radio"/> |
| KONFLIKTFÄHIGKEIT (eine Auseinandersetzung aufnehmen, konstruktiv bewältigen und nach Möglichkeit bereits im Vorfeld vermeiden)                                                                                                                                                               | <input type="radio"/> | <input type="radio"/> | <input type="radio"/>            | <input type="radio"/> | <input type="radio"/> |
| PROBLEMLÖSUNGSFÄHIGKEIT (Konkrete Aufgabenstellungen, für die es keinen vorgefertigten Lösungsansatz gibt, durch einen strukturierten Ansatz und Urteilkraft lösen)                                                                                                                           | <input type="radio"/> | <input type="radio"/> | <input type="radio"/>            | <input type="radio"/> | <input type="radio"/> |
| ORGANISATIONSTALENT (Fähigkeit, Arbeit in einem festgelegten Rahmen selber zu planen und zu organisieren)                                                                                                                                                                                     | <input type="radio"/> | <input type="radio"/> | <input type="radio"/>            | <input type="radio"/> | <input type="radio"/> |

|                                                                                                                                                                                                                | unwichtig             | eher unwichtig        | weder unwichtig, noch<br>wichtig | eher wichtig          | wichtig               |
|----------------------------------------------------------------------------------------------------------------------------------------------------------------------------------------------------------------|-----------------------|-----------------------|----------------------------------|-----------------------|-----------------------|
| SELSTBMANAGEMENT (eigenes Zeitmanagement, Terminplanung und Vernetzung mit Kollegen, Abschalten von der Arbeit (boundary management))                                                                          | <input type="radio"/> | <input type="radio"/> | <input type="radio"/>            | <input type="radio"/> | <input type="radio"/> |
| LERNKOMPETENZ (Fähigkeit und Bereitschaft, Informationen über Sachverhalte und Zusammenhänge selbstständig und auch gemeinsam mit anderen zu verstehen, auszuwerten und in gedankliche Strukturen einzuordnen) | <input type="radio"/> | <input type="radio"/> | <input type="radio"/>            | <input type="radio"/> | <input type="radio"/> |
| VERÄNDERUNGSKOMPETENZ (unterstützt Beschäftigte und Organisation dabei, den rasanten Wandel nicht als Bedrohung, sondern vielmehr als Chance und Herausforderung zu begreifen)                                 | <input type="radio"/> | <input type="radio"/> | <input type="radio"/>            | <input type="radio"/> | <input type="radio"/> |
| AGILES ARBEITEN (In einem für ein Endprodukt verantwortlichen Team iterativ (wiederholend) genau das erarbeiten, was dem Kunden Mehrwert stiftet)                                                              | <input type="radio"/> | <input type="radio"/> | <input type="radio"/>            | <input type="radio"/> | <input type="radio"/> |
| ADAPTIONSFÄHIGKEIT (Sich auf neue (technologische) Entwicklungen einlassen, sie vorteilhaft nutzen und auf verschiedene Situationen transferieren können)                                                      | <input type="radio"/> | <input type="radio"/> | <input type="radio"/>            | <input type="radio"/> | <input type="radio"/> |

|                                                                                                                                                                                                                                                                        | unwichtig             | eher unwichtig        | weder unwichtig, noch<br>wichtig | eher wichtig          | wichtig               |
|------------------------------------------------------------------------------------------------------------------------------------------------------------------------------------------------------------------------------------------------------------------------|-----------------------|-----------------------|----------------------------------|-----------------------|-----------------------|
| SERVICEORIENTIERUNG (Aktive Suche nach effizienten Möglichkeiten, den Menschen zu helfen)                                                                                                                                                                              | <input type="radio"/> | <input type="radio"/> | <input type="radio"/>            | <input type="radio"/> | <input type="radio"/> |
| FLEXIBILITÄT (Veränderte Herangehensweise an Situationen aufgrund einer unerwarteten und plötzlichen Veränderung der Bedürfnisse und der Stimmungslage von Menschen oder von Trends; Änderung von Strategien, Improvisation und Anpassung an die jeweiligen Umstände). | <input type="radio"/> | <input type="radio"/> | <input type="radio"/>            | <input type="radio"/> | <input type="radio"/> |
| BELASTBARKEIT (Bewältigen von Herausforderungen, Störungen und Veränderungen sowie Erholen von Rückschlägen und Widrigkeiten)                                                                                                                                          | <input type="radio"/> | <input type="radio"/> | <input type="radio"/>            | <input type="radio"/> | <input type="radio"/> |
| VERANTWORTUNGSBEWUSSTSEIN (Für von Ihnen oder anderen getroffene berufliche Entscheidungen Verantwortung übernehmen und Rechenschaft ablegen)                                                                                                                          | <input type="radio"/> | <input type="radio"/> | <input type="radio"/>            | <input type="radio"/> | <input type="radio"/> |
| ZUVERLÄSSIGKEIT (Handeln in einer Art und Weise, dass sich andere darauf verlassen oder stützen können)                                                                                                                                                                | <input type="radio"/> | <input type="radio"/> | <input type="radio"/>            | <input type="radio"/> | <input type="radio"/> |

## Haben Sie eine Nebentätigkeit?

☐ ja

☐ nein

## Welchem Tätigkeitsfeld kann diese zugeordnet werden?

- ☐ Bau, Architektur, Rohstoffe (z.B. Hoch-/Tiefbau, Glasherstellung)
- ☐ Chemie, Pharmazie, naturwissenschaftliche Laboranalyse (u.a. Arzneimittelherstellung)
- ☐ Einkauf, Lager, Logistik, Verkehr (z.B. Beschaffung, Dienstleistung im Personenverkehr)
- ☐ Elektro, Energie, Ver- und Entsorgung (z.B. Mechatronik, Elektrotechnik)
- ☐ Forschung, Entwicklung, Konstruktion, Technisches Zeichnen (z.B. Modellbau)
- ☐ Gastgewerbe, Tourismus, Veranstaltungsmanagement, Hauswirtschaft (z.B. Hotellerie)
- ☐ Gesundheit, Sport, Körperpflege (z.B. Therapie, Altenpflege, Rettungsdienst)
- ☐ Holz, Papier, Kunststoff, Farben und Lacke, Textil (u.a. Verarbeitung und Herstellung)
- ☐ IT, Computer, Datenerhebung, -analyse (u.a. IT-Entwicklung und IT Training)
- ☐ Landwirtschaft, Umwelt, Lebensmittel (z.B. Floristik, Lebensmittelherstellung)
- ☐ Medien, Kultur, Gestaltung, Kunst (u.a. Design, Moderation, Fotografie)
- ☐ Metall, Maschinen- und Fahrzeugbau (u.a. Klempnerei, Luft- & Raumfahrttechnik)
- ☐ Produktionsplanung und -steuerung, Qualitätssicherung, Instandhaltung (z.B. Kundendienst)
- ☐ Recht, Steuern, Wirtschaftsprüfung (z.B. Rechts- oder Steuerberatung)
- ☐ Schutz und Sicherheit, Reinigung (u.a. Gutachter, Polizei, Feuerwehr, Militär)
- ☐ Soziales, Pädagogik (z.B. Erzieher, Lehrer, Seelsorge, Sozialarbeiter)
- ☐ Wirtschaft, Verwaltung, Sprachen (u.a. Immobilienmanagement, Vertrieb/Verkauf, Büromanagement, Finanzwesen)
- ☐ Sonstige

## Bilden Sie sich zurzeit weiter?

- ☐ Ja. Damit habe ich aber schon vor Corona (März 2020) begonnen.
- ☐ Ja. Die Covid 19-Pandemie (inkl. möglicher Folgen) war für mich der Auslöser.
- ☐ Nein
- ☐ Nein, aber seit Corona denke ich darüber nach.

## Welche Art der Weiterbildung machen Sie?

- ☐ Ausbildung
- ☐ Studium
- ☐ Sprachkurs
- ☐ PC Kenntnisse
- ☐ Selbstständigkeit
- ☐ Sonstige

## In welchem Tätigkeitsfeld machen Sie eine Ausbildung?

---

- ☐ Bau, Architektur, Rohstoffe (z.B. Hoch-/Tiefbau, Glasherstellung)
- ☐ Chemie, Pharmazie, naturwissenschaftliche Laboranalyse (u.a. Arzneimittelherstellung)
- ☐ Einkauf, Lager, Logistik, Verkehr (z.B. Beschaffung, Dienstleistung im Personenverkehr)
- ☐ Elektro, Energie, Ver- und Entsorgung (z.B. Mechatronik, Elektrotechnik)
- ☐ Forschung, Entwicklung, Konstruktion, Technisches Zeichnen (z.B. Modellbau)
- ☐ Gastgewerbe, Tourismus, Veranstaltungsmanagement, Hauswirtschaft (z.B. Hotellerie)
- ☐ Gesundheit, Sport, Körperpflege (z.B. Therapie, Altenpflege, Rettungsdienst)
- ☐ Holz, Papier, Kunststoff, Farben und Lacke, Textil (u.a. Verarbeitung und Herstellung)
- ☐ IT, Computer, Datenerhebung, -analyse (u.a. IT-Entwicklung und IT Training)
- ☐ Landwirtschaft, Umwelt, Lebensmittel (z.B. Floristik, Lebensmittelherstellung)
- ☐ Medien, Kultur, Gestaltung, Kunst (u.a. Design, Moderation, Fotografie)
- ☐ Metall, Maschinen- und Fahrzeugbau (u.a. Klempnerei, Luft- & Raumfahrttechnik)
- ☐ Produktionsplanung und -steuerung, Qualitätssicherung, Instandhaltung (z.B. Kundendienst)
- ☐ Recht, Steuern, Wirtschaftsprüfung (z.B. Rechts- oder Steuerberatung)
- ☐ Schutz und Sicherheit, Reinigung (u.a. Gutachter, Polizei, Feuerwehr, Militär)
- ☐ Soziales, Pädagogik (z.B. Erzieher, Lehrer, Seelsorge, Sozialarbeiter)
- ☐ Wirtschaft, Verwaltung, Sprachen (u.a. Immobilienmanagement, Vertrieb/Verkauf, Büromanagement, Finanzwesen)
- ☐ Sonstige

## Wie nennt sich der Abschluss, den Sie anstreben?

---

## In welchem Studienfach studieren Sie?

---

- ☐ Agrar-, Forst-, Ernährungswissenschaften
- ☐ Ingenieurwissenschaften
- ☐ Mathematik, Naturwissenschaften
- ☐ Medizin, Gesundheitswissenschaften, Psychologie, Sport
- ☐ Wirtschaftswissenschaften
- ☐ Rechts-, Sozialwissenschaften
- ☐ Erziehungs-, Bildungswissenschaften, Lehrämter
- ☐ Sprach-, Kulturwissenschaften
- ☐ Kunst, Musik
- ☐ Sonstige

## Welchen Abschluss haben Sie als Ziel?

---

- ☐ Bachelor
- ☐ Master
- ☐ Staatsexamen
- ☐ Promotion
- ☐ Sonstige

## Haben Sie vor Corona ernsthaft darüber nachgedacht, die Fliegerei aufzugeben?

---

- ☐ ja
- ☐ manchmal
- ☐ nicht wirklich
- ☐ auf keinen Fall

## Sind Sie derzeit auf der Suche nach einem alternativen Arbeitsplatz?

---

- ☐ ja
- ☐ noch nicht, aber ich halte die Augen offen
- ☐ nein

**Angenommen die Covid-19 Pandemie ist der Auslöser für einen Jobwechsel. In welchem Tätigkeitsfeld rechnen Sie sich aufgrund Ihrer Kompetenzen, mit Berücksichtigung der aktuellen Corona-Situation, die höchste Erfolgswahrscheinlichkeit für einen Jobwechsel aus?**

---

- ☐ Bau, Architektur, Rohstoffe (z.B. Hoch-/Tiefbau, Glasherstellung)
- ☐ Chemie, Pharmazie, naturwissenschaftliche Laboranalyse (u.a. Arzneimittelherstellung)
- ☐ Einkauf, Lager, Logistik, Verkehr (z.B. Beschaffung, Dienstleistung im Personenverkehr)
- ☐ Elektro, Energie, Ver- und Entsorgung (z.B. Mechatronik, Elektrotechnik)
- ☐ Forschung, Entwicklung, Konstruktion, Technisches Zeichnen (z.B. Modellbau)
- ☐ Gastgewerbe, Tourismus, Veranstaltungsmanagement, Hauswirtschaft (z.B. Hotellerie)
- ☐ Gesundheit, Sport, Körperpflege (z.B. Therapie, Altenpflege, Rettungsdienst)
- ☐ Holz, Papier, Kunststoff, Farben und Lacke, Textil (u.a. Verarbeitung und Herstellung)
- ☐ IT, Computer, Datenerhebung, -analyse (u.a. IT-Entwicklung und IT Training)
- ☐ Landwirtschaft, Umwelt, Lebensmittel (z.B. Floristik, Lebensmittelherstellung)
- ☐ Medien, Kultur, Gestaltung, Kunst (u.a. Design, Moderation, Fotografie)
- ☐ Metall, Maschinen- und Fahrzeugbau (u.a. Klempnerei, Luft- & Raumfahrttechnik)
- ☐ Produktionsplanung und -steuerung, Qualitätssicherung, Instandhaltung (z.B. Kundendienst)
- ☐ Recht, Steuern, Wirtschaftsprüfung (z.B. Rechts- oder Steuerberatung)
- ☐ Schutz und Sicherheit, Reinigung (u.a. Gutachter, Polizei, Feuerwehr, Militär)
- ☐ Soziales, Pädagogik (z.B. Erzieher, Lehrer, Seelsorge, Sozialarbeiter)
- ☐ Wirtschaft, Verwaltung, Sprachen (u.a. Immobilienmanagement, Vertrieb/Verkauf, Büromanagement, Finanzwesen)
- ☐ Sonstige

**Für welches Berufsbild innerhalb des o.g. Tätigkeitsfeldes würden Sie sich interessieren?**

---

Bitte geben Sie einen Beruf bzw. Job Titel an.

- ☐ Ich weiß es noch nicht

- ☐



## Zum allgemeinen Verständnis:

Unter Zukunftskompetenzen können Schlüsselkompetenzen verstanden werden, die in der heutigen und vor allem in der zukünftigen Arbeitswelt von Arbeitgebern gefordert werden und helfen, erfolgreich zu sein. Kompetenzen und Fähigkeiten werden hier synonym verwendet.

## Bitte schätzen Sie ein, wie wichtig es für Arbeitgeber heutzutage ist, dass Ihre Angestellten folgende Fähigkeiten beherrschen?

Bitte bewerten Sie die Wichtigkeit.

|                                                                                                                                                                                                                                                                                               | unwichtig             | eher unwichtig        | weder unwichtig, noch<br>wichtig | eher wichtig          | wichtig               |
|-----------------------------------------------------------------------------------------------------------------------------------------------------------------------------------------------------------------------------------------------------------------------------------------------|-----------------------|-----------------------|----------------------------------|-----------------------|-----------------------|
| IT-FACHWISSEN, SOFTWAREPROGRAMMIERUNG                                                                                                                                                                                                                                                         | <input type="radio"/> | <input type="radio"/> | <input type="radio"/>            | <input type="radio"/> | <input type="radio"/> |
| DIGITAL LITERACY (Beherrschen von grundlegenden digitalen Skills, z.B. sorgsamer Umgang mit digitalen persönlichen Daten, Nutzen gängiger Software, Interagieren mit künstlicher Intelligenz)                                                                                                 | <input type="radio"/> | <input type="radio"/> | <input type="radio"/>            | <input type="radio"/> | <input type="radio"/> |
| DIGITAL LEARNING (Fähigkeit aus einer Vielzahl digitaler Informationen valides Wissen zu ausgewählten Themengebieten aufzubauen)                                                                                                                                                              | <input type="radio"/> | <input type="radio"/> | <input type="radio"/>            | <input type="radio"/> | <input type="radio"/> |
| DIGITALE INTERAKTION (Bei Interaktion über Online-Kanäle andere verstehen und sich ihnen gegenüber angemessen verhalten („Digitaler Knigge“))                                                                                                                                                 | <input type="radio"/> | <input type="radio"/> | <input type="radio"/>            | <input type="radio"/> | <input type="radio"/> |
| KOLLABORATIONSFÄHIGKEIT (Unabhängig von räumlicher Nähe und über verschiedene Disziplinen und Kulturen hinweg effektiv und effizient zusammenarbeiten, um als Team bessere Resultate als Einzelpersonen zu erzielen)                                                                          | <input type="radio"/> | <input type="radio"/> | <input type="radio"/>            | <input type="radio"/> | <input type="radio"/> |
|                                                                                                                                                                                                                                                                                               | unwichtig             | eher unwichtig        | weder unwichtig, noch<br>wichtig | eher wichtig          | wichtig               |
| TEAMFÄHIGKEIT (Vertrauensvolle Zusammenarbeit in einem Team, in dem jedes Teammitglied seinen Aufgabenbereich hat)                                                                                                                                                                            | <input type="radio"/> | <input type="radio"/> | <input type="radio"/>            | <input type="radio"/> | <input type="radio"/> |
| KOMMUNIKATIONSFÄHIGKEIT (die Fähigkeit zur Übermittlung von Informationen, um sicherzustellen, dass die Bedeutungen unter Berücksichtigung des Publikums und des Mediums wirksam zum Ausdruck gebracht werden. Gleichzeitig gut zuhören und Mimik/Gestik des Gegenübers entschlüsseln können) | <input type="radio"/> | <input type="radio"/> | <input type="radio"/>            | <input type="radio"/> | <input type="radio"/> |
| KONFLIKTFÄHIGKEIT (eine Auseinandersetzung aufnehmen, konstruktiv bewältigen und nach Möglichkeit bereits im Vorfeld vermeiden)                                                                                                                                                               | <input type="radio"/> | <input type="radio"/> | <input type="radio"/>            | <input type="radio"/> | <input type="radio"/> |
| PROBLEMLÖSUNGSFÄHIGKEIT (Konkrete Aufgabenstellungen, für die es keinen vorgefertigten Lösungsansatz gibt, durch einen strukturierten Ansatz und Urteilkraft lösen)                                                                                                                           | <input type="radio"/> | <input type="radio"/> | <input type="radio"/>            | <input type="radio"/> | <input type="radio"/> |
| ORGANISATIONSTALENT (Fähigkeit, Arbeit in einem festgelegten Rahmen selber zu planen und zu organisieren)                                                                                                                                                                                     | <input type="radio"/> | <input type="radio"/> | <input type="radio"/>            | <input type="radio"/> | <input type="radio"/> |

|                                                                                                                                                                                                                | unwichtig             | eher unwichtig        | weder unwichtig, noch<br>wichtig | eher wichtig          | wichtig               |
|----------------------------------------------------------------------------------------------------------------------------------------------------------------------------------------------------------------|-----------------------|-----------------------|----------------------------------|-----------------------|-----------------------|
| SELBSTMANAGEMENT (eigenes Zeitmanagement, Terminplanung und Vernetzung mit Kollegen, Abschalten von der Arbeit (boundary management))                                                                          | <input type="radio"/> | <input type="radio"/> | <input type="radio"/>            | <input type="radio"/> | <input type="radio"/> |
| LERNKOMPETENZ (Fähigkeit und Bereitschaft, Informationen über Sachverhalte und Zusammenhänge selbstständig und auch gemeinsam mit anderen zu verstehen, auszuwerten und in gedankliche Strukturen einzuordnen) | <input type="radio"/> | <input type="radio"/> | <input type="radio"/>            | <input type="radio"/> | <input type="radio"/> |
| VERÄNDERUNGSKOMPETENZ (unterstützt Beschäftigte und Organisation dabei, den rasanten Wandel nicht als Bedrohung, sondern vielmehr als Chance und Herausforderung zu begreifen)                                 | <input type="radio"/> | <input type="radio"/> | <input type="radio"/>            | <input type="radio"/> | <input type="radio"/> |
| AGILES ARBEITEN (In einem für ein Endprodukt verantwortlichen Team iterativ (wiederholend) genau das erarbeiten, was dem Kunden Mehrwert stiftet)                                                              | <input type="radio"/> | <input type="radio"/> | <input type="radio"/>            | <input type="radio"/> | <input type="radio"/> |
| ADAPTIONSFÄHIGKEIT (Sich auf neue (technologische) Entwicklungen einlassen, sie vorteilhaft nutzen und auf verschiedene Situationen transferieren können)                                                      | <input type="radio"/> | <input type="radio"/> | <input type="radio"/>            | <input type="radio"/> | <input type="radio"/> |
|                                                                                                                                                                                                                | unwichtig             | eher unwichtig        | weder unwichtig, noch<br>wichtig | eher wichtig          | wichtig               |
| SERVICEORIENTIERUNG (Aktive Suche nach effizienten Möglichkeiten, den Menschen zu helfen)                                                                                                                      | <input type="radio"/> | <input type="radio"/> | <input type="radio"/>            | <input type="radio"/> | <input type="radio"/> |

**Welche 5 Kompetenzen werden Ihrer Meinung nach am ehesten in dem Tätigkeitsfeld gefordert, in dem Sie alternativ arbeiten würden? – siehe Antwort zu Frage 16. Bitte wählen Sie 5 Kompetenzen aus.**

|                                                                                                                                                                                                                                                                                                                        |                                                                                                                                                                                                                                               |                                                                                                                                                                                                                                         |
|------------------------------------------------------------------------------------------------------------------------------------------------------------------------------------------------------------------------------------------------------------------------------------------------------------------------|-----------------------------------------------------------------------------------------------------------------------------------------------------------------------------------------------------------------------------------------------|-----------------------------------------------------------------------------------------------------------------------------------------------------------------------------------------------------------------------------------------|
| <input type="checkbox"/> IT- FACHWISSEN, SOFTWAREPROGRAMMIERUNG                                                                                                                                                                                                                                                        | <input type="checkbox"/> DIGITAL LITERACY (Beherrschen von grundlegenden digitalen Skills, z.B. sorgsamer Umgang mit digitalen persönlichen Daten, Nutzen gängiger Software, Interagieren mit künstlicher Intelligenz)                        | <input type="checkbox"/> DIGITAL LEARNING (Fähigkeit aus einer Vielzahl digitaler Informationen valides Wissen zu ausgewählten Themengebieten aufzubauen)                                                                               |
| <input type="checkbox"/> DIGITALE INTERAKTION (Bei Interaktion über Online-Kanäle andere verstehen und sich ihnen gegenüber angemessen verhalten („Digitaler Knigge“))                                                                                                                                                 | <input type="checkbox"/> KOLLABORATIONSFÄHIGKEIT (Unabhängig von räumlicher Nähe und über verschiedene Disziplinen und Kulturen hinweg effektiv und effizient zusammenarbeiten, um als Team bessere Resultate als Einzelpersonen zu erzielen) | <input type="checkbox"/> TEAMFÄHIGKEIT (Vertrauensvolle Zusammenarbeit in einem Team, in dem jedes Teammitglied seinen Aufgabenbereich hat)                                                                                             |
| <input type="checkbox"/> KOMMUNIKATIONSFÄHIGKEIT (die Fähigkeit zur Übermittlung von Informationen, um sicherzustellen, dass die Bedeutungen unter Berücksichtigung des Publikums und des Mediums wirksam zum Ausdruck gebracht werden. Gleichzeitig gut zuhören und Mimik/Gestik des Gegenübers entschlüsseln können) | <input type="checkbox"/> KONFLIKTFÄHIGKEIT (eine Auseinandersetzung aufnehmen, konstruktiv bewältigen und nach Möglichkeit bereits im Vorfeld vermeiden)                                                                                      | <input type="checkbox"/> PROBLEMLÖSUNGSFÄHIGKEIT (Konkrete Aufgabenstellungen, für die es keinen vorgefertigten Lösungsansatz gibt, durch einen strukturierten Ansatz und Urteilkraft lösen)                                            |
| <input type="checkbox"/> ORGANISATIONSTALENT (Fähigkeit, Arbeit in einem festgelegten Rahmen selber zu planen und zu organisieren)                                                                                                                                                                                     | <input type="checkbox"/> SELBSTMANAGEMENT (eigenes Zeitmanagement, Terminplanung und Vernetzung mit Kollegen, Abschalten von der Arbeit (boundary management))                                                                                | <input type="checkbox"/> LERNKOMPETENZ (Fähigkeit und Bereitschaft, Informationen über Sachverhalte und Zusammenhänge selbstständig und auch gemeinsam mit anderen zu verstehen, auszuwerten und in gedankliche Strukturen einzuordnen) |
| <input type="checkbox"/> VERÄNDERUNGSKOMPETENZ (unterstützt Beschäftigte und Organisation dabei, den rasanten Wandel nicht als Bedrohung, sondern vielmehr als Chance und Herausforderung zu begreifen)                                                                                                                | <input type="checkbox"/> AGILES ARBEITEN (In einem für ein Endprodukt verantwortlichen Team iterativ (wiederholend) genau das erarbeiten, was dem Kunden Mehrwert stiftet)                                                                    | <input type="checkbox"/> ADAPTIONSFÄHIGKEIT (Sich auf neue (technologische) Entwicklungen einlassen, sie vorteilhaft nutzen und auf verschiedene Situationen transferieren können)                                                      |
| <input type="checkbox"/> SERVICEORIENTIERUNG (Aktive Suche nach effizienten Möglichkeiten, den Menschen zu helfen)                                                                                                                                                                                                     |                                                                                                                                                                                                                                               |                                                                                                                                                                                                                                         |

## Inwiefern treffen folgende Aussagen auf Sie zu?

Bitte bewerten Sie folgende Aussagen.

|                                                                                                                                                                                                                                                                                                         | trifft überhaupt nicht zu | trifft eher weniger zu | teils/teils           | trifft eher zu        | trifft voll und ganz zu |
|---------------------------------------------------------------------------------------------------------------------------------------------------------------------------------------------------------------------------------------------------------------------------------------------------------|---------------------------|------------------------|-----------------------|-----------------------|-------------------------|
| Ich habe mir IT- Fachwissen angeeignet und kann Software programmieren.                                                                                                                                                                                                                                 | <input type="radio"/>     | <input type="radio"/>  | <input type="radio"/> | <input type="radio"/> | <input type="radio"/>   |
| Ich beherrsche die grundlegenden digitalen Skills, z.B. sorgsamer Umgang mit digitalen persönlichen Daten, Nutzen gängiger Software, Interagieren mit künstlicher Intelligenz.                                                                                                                          | <input type="radio"/>     | <input type="radio"/>  | <input type="radio"/> | <input type="radio"/> | <input type="radio"/>   |
| Ich besitze die Fähigkeit aus einer Vielzahl digitaler Informationen valides Wissen zu ausgewählten Themengebieten aufbauen.                                                                                                                                                                            | <input type="radio"/>     | <input type="radio"/>  | <input type="radio"/> | <input type="radio"/> | <input type="radio"/>   |
| Bei Interaktion über Online-Kanäle kann ich andere verstehen und mich ihnen gegenüber angemessen verhalten.                                                                                                                                                                                             | <input type="radio"/>     | <input type="radio"/>  | <input type="radio"/> | <input type="radio"/> | <input type="radio"/>   |
| Ich kann mich gut in andere Menschen (auch verschiedener Disziplinen und Kulturen) und Ihre Sichtweise hineinversetzen und diese ggf. annehmen/einen Kompromiss schließen, wenn es zu einer besseren Lösung für das Team führt.                                                                         | <input type="radio"/>     | <input type="radio"/>  | <input type="radio"/> | <input type="radio"/> | <input type="radio"/>   |
|                                                                                                                                                                                                                                                                                                         | trifft überhaupt nicht zu | trifft eher weniger zu | teils/teils           | trifft eher zu        | trifft voll und ganz zu |
| Ich pflege eine vertrauensvolle Zusammenarbeit in einem Team, in dem jedes Teammitglied seinen Aufgabenbereich hat.                                                                                                                                                                                     | <input type="radio"/>     | <input type="radio"/>  | <input type="radio"/> | <input type="radio"/> | <input type="radio"/>   |
| Ich kann Botschaften klar und deutlich formulieren, Informationen übermitteln und stelle so sicher, dass die Bedeutungen unter Berücksichtigung des Publikums und des Mediums wirksam zum Ausdruck gebracht werden. Außerdem kann ich gut zuhören und die Mimik/Gestik meines Gegenübers entschlüsseln. | <input type="radio"/>     | <input type="radio"/>  | <input type="radio"/> | <input type="radio"/> | <input type="radio"/>   |
| Wenn es nötig ist, kann ich eine Auseinandersetzung aufnehmen und diese konstruktiv bewältigen. Nach Möglichkeit versuche ich jedoch Konflikte bereits im Vorfeld zu vermeiden.                                                                                                                         | <input type="radio"/>     | <input type="radio"/>  | <input type="radio"/> | <input type="radio"/> | <input type="radio"/>   |
| Ich kann eine konkrete Aufgabenstellung durch einen strukturierten Ansatz und meine Urteilskraft lösen, wenn es keinen vorgefertigten Lösungsansatz gibt.                                                                                                                                               | <input type="radio"/>     | <input type="radio"/>  | <input type="radio"/> | <input type="radio"/> | <input type="radio"/>   |
| Ich bin gut darin, Arbeit in einem festgelegten Rahmen selber zu planen und zu organisieren                                                                                                                                                                                                             | <input type="radio"/>     | <input type="radio"/>  | <input type="radio"/> | <input type="radio"/> | <input type="radio"/>   |

|                                                                                                                                                                                                     | trifft überhaupt nicht zu | trifft eher weniger zu | teils/teils           | trifft eher zu        | trifft voll und ganz zu |
|-----------------------------------------------------------------------------------------------------------------------------------------------------------------------------------------------------|---------------------------|------------------------|-----------------------|-----------------------|-------------------------|
| Ich habe ein gutes Zeitmanagement (inkl. Terminplanung und Vernetzung mit Kollegen). Die Arbeit muss ich – auch gedanklich- nicht mit nach Hause nehmen.                                            | <input type="radio"/>     | <input type="radio"/>  | <input type="radio"/> | <input type="radio"/> | <input type="radio"/>   |
| Ich informiere mich über Sachverhalte und Zusammenhänge selbstständig, kann diese verstehen und bin auch bereit, diese gemeinsam mit anderen auszuwerten und in gedankliche Strukturen einzuordnen. | <input type="radio"/>     | <input type="radio"/>  | <input type="radio"/> | <input type="radio"/> | <input type="radio"/>   |
| Der digitale und rasante Wandel ist für mich keine Bedrohung. Vielmehr begreife ich ihn als Chance und Herausforderung.                                                                             | <input type="radio"/>     | <input type="radio"/>  | <input type="radio"/> | <input type="radio"/> | <input type="radio"/>   |
| Es ist für mich ein Leichtes, wiederholend genau das zu erarbeiten, was dem Kunden Mehrwert stiftet.                                                                                                | <input type="radio"/>     | <input type="radio"/>  | <input type="radio"/> | <input type="radio"/> | <input type="radio"/>   |
| Ich kann mich gut auf neue (technologische) Entwicklungen einlassen, sie vorteilhaft nutzen und auf verschiedene Situationen transferieren.                                                         | <input type="radio"/>     | <input type="radio"/>  | <input type="radio"/> | <input type="radio"/> | <input type="radio"/>   |
|                                                                                                                                                                                                     | trifft überhaupt nicht zu | trifft eher weniger zu | teils/teils           | trifft eher zu        | trifft voll und ganz zu |
| Ich suche aktiv nach effizienten Möglichkeiten, den Menschen zu helfen.                                                                                                                             | <input type="radio"/>     | <input type="radio"/>  | <input type="radio"/> | <input type="radio"/> | <input type="radio"/>   |

## Wie wahrscheinlich ist es, dass Sie sich folgende Kompetenzen aneignen, um am heutigen Jobmarkt allgemein attraktiv für Arbeitgeber zu sein?

|                                                                                                                                                                                                                                                                                               | unwahrscheinlich      | eher unwahrscheinlich | es kommt auf die Situation drauf an | eher wahrscheinlich   | sehr wahrscheinlich   |
|-----------------------------------------------------------------------------------------------------------------------------------------------------------------------------------------------------------------------------------------------------------------------------------------------|-----------------------|-----------------------|-------------------------------------|-----------------------|-----------------------|
| IT- FACHWISSEN, SOFTWAREPROGRAMMIERUNG                                                                                                                                                                                                                                                        | <input type="radio"/> | <input type="radio"/> | <input type="radio"/>               | <input type="radio"/> | <input type="radio"/> |
| DIGITAL LITERACY (Beherrschen von grundlegenden digitalen Skills, z.B. sorgsamer Umgang mit digitalen persönlichen Daten, Nutzen gängiger Software, Interagieren mit künstlicher Intelligenz)                                                                                                 | <input type="radio"/> | <input type="radio"/> | <input type="radio"/>               | <input type="radio"/> | <input type="radio"/> |
| DIGITAL LEARNING (Fähigkeit aus einer Vielzahl digitaler Informationen valides Wissen zu ausgewählten Themengebieten aufzubauen)                                                                                                                                                              | <input type="radio"/> | <input type="radio"/> | <input type="radio"/>               | <input type="radio"/> | <input type="radio"/> |
| DIGITALE INTERAKTION (Bei Interaktion über Online-Kanäle andere verstehen und sich ihnen gegenüber angemessen verhalten („Digitaler Knigge“))                                                                                                                                                 | <input type="radio"/> | <input type="radio"/> | <input type="radio"/>               | <input type="radio"/> | <input type="radio"/> |
| KOLLABORATIONSFÄHIGKEIT (Unabhängig von räumlicher Nähe und über verschiedene Disziplinen und Kulturen hinweg effektiv und effizient zusammenarbeiten, um als Team bessere Resultate als Einzelpersonen zu erzielen)                                                                          | <input type="radio"/> | <input type="radio"/> | <input type="radio"/>               | <input type="radio"/> | <input type="radio"/> |
|                                                                                                                                                                                                                                                                                               | unwahrscheinlich      | eher unwahrscheinlich | es kommt auf die Situation drauf an | eher wahrscheinlich   | sehr wahrscheinlich   |
| TEAMFÄHIGKEIT (Vertrauensvolle Zusammenarbeit in einem Team, in dem jedes Teammitglied seinen Aufgabenbereich hat)                                                                                                                                                                            | <input type="radio"/> | <input type="radio"/> | <input type="radio"/>               | <input type="radio"/> | <input type="radio"/> |
| KOMMUNIKATIONSFÄHIGKEIT (die Fähigkeit zur Übermittlung von Informationen, um sicherzustellen, dass die Bedeutungen unter Berücksichtigung des Publikums und des Mediums wirksam zum Ausdruck gebracht werden. Gleichzeitig gut zuhören und Mimik/Gestik des Gegenübers entschlüsseln können) | <input type="radio"/> | <input type="radio"/> | <input type="radio"/>               | <input type="radio"/> | <input type="radio"/> |
| KONFLIKTFÄHIGKEIT (eine Auseinandersetzung aufnehmen, konstruktiv bewältigen und nach Möglichkeit bereits im Vorfeld vermeiden)                                                                                                                                                               | <input type="radio"/> | <input type="radio"/> | <input type="radio"/>               | <input type="radio"/> | <input type="radio"/> |
| PROBLEMLÖSUNGSFÄHIGKEIT (Konkrete Aufgabenstellungen, für die es keinen vorgefertigten Lösungsansatz gibt, durch einen strukturierten Ansatz und Urteilskraft lösen)                                                                                                                          | <input type="radio"/> | <input type="radio"/> | <input type="radio"/>               | <input type="radio"/> | <input type="radio"/> |
| ORGANISATIONSTALENT (Fähigkeit, Arbeit in einem festgelegten Rahmen selber zu planen und zu organisieren)                                                                                                                                                                                     | <input type="radio"/> | <input type="radio"/> | <input type="radio"/>               | <input type="radio"/> | <input type="radio"/> |

|                                                                                                                                                                                                                | unwahrscheinlich      | eher unwahrscheinlich | es kommt auf die Situation drauf an | eher wahrscheinlich   | sehr wahrscheinlich   |
|----------------------------------------------------------------------------------------------------------------------------------------------------------------------------------------------------------------|-----------------------|-----------------------|-------------------------------------|-----------------------|-----------------------|
| SELBSTMANAGEMENT (eigenes Zeitmanagement, Terminplanung und Vernetzung mit Kollegen, Abschalten von der Arbeit (boundary management))                                                                          | <input type="radio"/> | <input type="radio"/> | <input type="radio"/>               | <input type="radio"/> | <input type="radio"/> |
| LERNKOMPETENZ (Fähigkeit und Bereitschaft, Informationen über Sachverhalte und Zusammenhänge selbstständig und auch gemeinsam mit anderen zu verstehen, auszuwerten und in gedankliche Strukturen einzuordnen) | <input type="radio"/> | <input type="radio"/> | <input type="radio"/>               | <input type="radio"/> | <input type="radio"/> |
| VERÄNDERUNGSKOMPETENZ (unterstützt Beschäftigte und Organisation dabei, den rasanten Wandel nicht als Bedrohung, sondern vielmehr als Chance und Herausforderung zu begreifen)                                 | <input type="radio"/> | <input type="radio"/> | <input type="radio"/>               | <input type="radio"/> | <input type="radio"/> |
| AGILES ARBEITEN (In einem für ein Endprodukt verantwortlichen Team iterativ (wiederholend) genau das erarbeiten, was dem Kunden Mehrwert stiftet)                                                              | <input type="radio"/> | <input type="radio"/> | <input type="radio"/>               | <input type="radio"/> | <input type="radio"/> |
| ADAPTIONSFÄHIGKEIT (Sich auf neue (technologische) Entwicklungen einlassen, sie vorteilhaft nutzen und auf verschiedene Situationen transferieren können)                                                      | <input type="radio"/> | <input type="radio"/> | <input type="radio"/>               | <input type="radio"/> | <input type="radio"/> |

  

|                                                                                           | unwahrscheinlich      | eher unwahrscheinlich | es kommt auf die Situation drauf an | eher wahrscheinlich   | sehr wahrscheinlich   |
|-------------------------------------------------------------------------------------------|-----------------------|-----------------------|-------------------------------------|-----------------------|-----------------------|
| SERVICEORIENTIERUNG (Aktive Suche nach effizienten Möglichkeiten, den Menschen zu helfen) | <input type="radio"/> | <input type="radio"/> | <input type="radio"/>               | <input type="radio"/> | <input type="radio"/> |

## Bitte geben Sie ihr Geschlecht an.

☐ Männlich

☐ Weiblich

☐ Divers

## Wie alt sind Sie?

☐ 18 – 22 Jahre

☐ 23 - 28 Jahre

☐ 29 - 35 Jahre

☐ 36 – 45 Jahre

☐ 46 – 55 Jahre

☐ Über 55 Jahre





**Die Umfrage ist beendet.**

Vielen Dank für die Teilnahme.

**bleiben Sie gesund und alles Gute!**

**Das Fenster kann nun geschlossen werden.**
